# Supplementary material
Source: Springer Nature journal article supplement (https://www.springermedizin.de/resource/supplementary/13601_2014_1056_MOESM1_ESM.pdf/9678600)
Supplement: MOESM1 [file 9678600]

# Doctor's Questionnaire (DQ)

**NOTE: Fill in one D-Q per Doctor, not per center**

**\*1. Personal Doctor Code Identification (assigned by Study Coordinator, information in contact email)**

**\*2. Which is/are your speciality/ties?**

Allergy

Immunology

Pulmonology

Pediatrics

Dermatology

GP

ENT

Others (please specify)

**\*3. Could you please specify your experience in... ?**

Allergy (in years)

Allergen Specific Immunotherapy (in years)

**\*4. What is the affiliation of the patients that you will include in this survey?**

Public

Private

**\*5. What is the approximate number of NEW patients with respiratory allergy that you see per year?**

**\*6. Approximately what percentage (%) of these NEW patients go into Allergen Immunotherapy?**

0 5 10 15 20 25 30 35 40 45 50 55 60 65 70 75 80 85 90 95 100

% of New patients

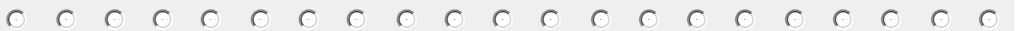

**\*7. How are your prescriptions, expressed in percentage (%), divided between both routes?**

Subcutaneous Immunotherapy

Sublingual Immunotherapy

**Confirm doctor identification code**

Dear doctor, please be so kind to fill in again your identification code in order to minimize data entry mistakes. Thanks for your help.

**\*8. Personal Doctor Code Identification (assigned by Study Coordinator, information in contact email)**

## Doctor's Questionnaire (DQ)

### **\*9. Thank you for completing this questionnaire, do you want to submit it?**

- Yes, when YES is ticked, your questionnaire will be submitted and you will not be able to change any given answer
- No, when NO is ticked, you will be sent to the first question to review the given answers
